# Supplementary material for: Phosphorylation site topology governs the functional dynamics of arrestin recruitment to GPCRs
Source: Research Square preprint supplement (doi:10.21203/rs.3.rs-9071664/v1), 2026-04-14
Supplement: Supplementary file 1 [file 839a210f47ebbed9d42b7914.xlsx]

## Sheet: Tabelle1
		arr2, residue replaced by BrEtY													arr2, residue replaced by BrEtY													arr2, residue replaced by BrEtY													arr2, residue replaced by BrEtY
		G5	R7	K10	K11	P14	R25	D44	P45	E46	K49	Y63			G64	R65	E66	D67	L68	D69	V70	L71	G72	L73	F75			R76	K77	D78	L79	F80	P87	P89	P91	E92	D93	K94			L97	R99	R103	I105	K106	K107	L108	E110	T136
M2R, residue replaced by Cys	I48												M2R, residue replaced by Cys	I48												M2R, residue replaced by Cys	R121												M2R, residue replaced by Cys	K222
	K49													K49													Y122													E223
	V50													V50													F123													P224
	N51													N51													C124													V225
	R52													R52													V125													A226
	H53													H53													T126													N227
	L54													L54													K127													Q228
	Q55													Q55													P128													D229
	T56													T56													L129													P230
	V57													V57													T130													V231
	N58													N58													I209													E281
	N59													N59													S210													S282
	S118													S118													R211													S283
	F119													F119													A212													N284
	D120													D120													S213													D285
	R121													R121													K214													S286
	Y122													Y122													S215													T287
	F123													F123													R216													S288
	C124													C124													I217													V289
	V125													V125													K218													S290
	T126													T126													K219													Q303
	K127													K127													D220													D304
	P128													P128													K221													E305
	L129													L129													K222													N306
	T130													T130													E223													T307
	Y131													Y131													P224													V308
	P132													P132													V225													S309
	V133													V133													A226													T310
	K134													K134													N227													S311
	R135													R135													Q228													L312
	T136													T136													D229													G313		182.6	150.9
	T137													T137													P230													H314		455.3	186.9		78.1
	K138													K138													V231													S315		266.8	90.87		159.9
	M139													M139													C324													K316		141.6	134.3		176.7		12.2	11.43
	A140													A140													I325													D317		98.63	95.2		127.2		13.53	18.4
	G141													G141													R326													E318		6.9	30.87		6.667		6.867	10.17
	I209													I209													I327													N319		97.57	70.13		132.4		53.4	35.47
	S210													S210													G328													S320		77.57	59.3		115.1		11.77	39.9
	R211													R211													T329													K321		55.33	54.17		85.47		10.5	39.13
	A212													A212													K330													Q322		54.53	54.07		91.67		14.6	65.93
	S213													S213													T331													T323					78.47		10.23	62.07
	K214													K214													P332													C324							4.3	35.2
	S215													S215													K333													I325							6.8	58.03
	R216													R216													M368
	I217													I217													T369
	K218													K218													K370
	K219													K219													Q371
	D220													D220													P372
		arr2, residue replaced by BrEtY													arr2, residue replaced by BrEtY													arr2, residue replaced by BrEtY
		G5	R7	K10	K11	P14	R25	D44	P45	E46	K49	Y63			G64	R65	E66	D67	L68	D69	V70	L71	G72	L73	F75			R76	K77	D78	L79	F80	P87	P89	P91	E92	D93	K94
M2R, residue replaced by Cys	K221												M2R, residue replaced by Cys	K221												M2R, residue replaced by Cys	A373
	K222													K222													K374
	E223													E223													K375
	P224													P224													K376
	V225													V225													P377
	D298					53								A226													P378
	D299					68.67								N227													P379
	E300					58.6								Q228													S380
	I301					98.63								D229													R81
	T302					95.67								P230													E382
	Q303	12.03	10.1			63.83	16.75							V231													K383
	D304	17.2	13.53			46.27	19.75							T369													K384
	E305	12.23	10.23			29.33	20.6							K370													Y440
	N306	15.1	10.13			26.77	18.98							Q371													A441
	T307	5.767	11.9			9.267	46.73							P372													L442
	V308	3.2	9.575				16.05							A373													C443
	S309	48.4	15.43				17.03							K374													N444
	T310	13.73	13.33				16.1							K375
	S311	56.73	38.45				15							K376
	L312	8.067	45.65				11.08							P377
	C324													P378
	I325													P379
	R326													S380
	I327													R81
	G328													E382
	T329													K383
	K330													K384
	T331													C439
	P332													Y440
	K333													A441
	S334													L442
	D335													C443
	S336													N444
	C337													A445
	T338													T446
	P339													F447
	T340													K448
	N341													K449
	T342													T450
	T343													F451
	V344													K452
	E345													H453
	V346													L454
	V347													L455
	G348													M456
	K374													C457
	K375													H458
	K376													Y459
		arr2, residue replaced by BrEtY													arr2, residue replaced by BrEtY
		G5	R7	K10	K11	P14	R25	D44	P45	E46	K49	Y63			G64	R65	E66	D67	L68	D69	V70	L71	G72	L73	F75
M2R, residue replaced by Cys	P377												M2R, residue replaced by Cys	K460
	P378													N461
	P379													I462
	S380
	R81
	E382
	K383
	K384
	C439
	Y440
	A441
	L442
	C443
	N444
	A445
	T446
	F447
	K448
	K449
	T450
	F451
	K452
	H453
	L454
	L455
	M456
	C457
	H458
	Y459
	K460
	N461
	I462
			significant crosslinking
			not significant
			no crosslinking
			not tested
[truncated: 26 more columns]
